# Supplementary material
Source: MDPI journal article supplement (https://www.mdpi.com/2571-9394/2/2/8)
Supplement: s1 [file s1]

# Supplementary materials for “Dynamic Modeling of Power Outages Caused by Thunderstorms”

Berk Alpay<sup>1</sup>, David Wanik<sup>2</sup>, Peter Watson<sup>3</sup>, Diego Cerrai<sup>3</sup>, Guannan Liang<sup>1</sup>, and  
Emmanouil Anagnostou<sup>3</sup>

<sup>1</sup>University of Connecticut, Department of Computer Science and Engineering

<sup>2</sup>University of Connecticut, Department of Operations and Information Management

<sup>3</sup>University of Connecticut, Department of Civil and Environmental Engineering

# 1 Description of the LSTM model

Recurrent neural networks (RNN) are designed to optimize dynamically interconnected, non-linear parameters [1]. We use this property to capture temporal relationships in chaotic atmospheric contexts. The viability of such a model in atmospheric science was demonstrated in the area of sequential weather forecasting [2]. The RNN is used with long short-term memory (LSTM) structure to adjust for lags between severe weather and outage occurrences, as LSTMs were shown to be capable of learning long-term dependencies between features and response [3]. A mathematical description of the operation of an LSTM unit within a neural network now follows.

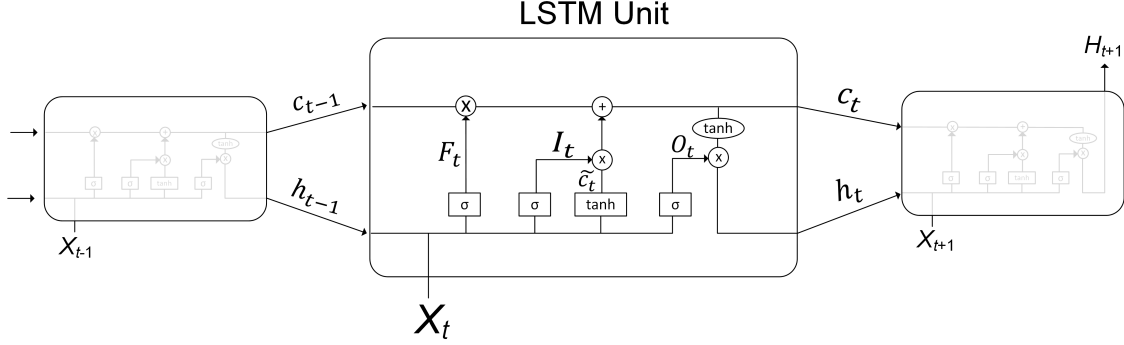

Figure 1: Unrolled architecture of an LSTM node in a neural network. The  $t$ th unit has been enlarged.

Let  $x = [x_1, \dots, x_t, \dots, x_T]$  be a timeseries data sample, where  $x_t$  for  $t \in [1, \dots, T]$  represents the  $t$ -th observation in the series. In our application,  $x_1, \dots, x_T$  corresponds to each hour  $[h - l, \dots, h]$ , where  $h$  is the current hour and  $l$  the lookback period.

From Figure 1, we see that each LSTM unit is composed of the following components: memory cell  $c_t$ ; input gate  $i_t$ ; forget gate  $f_t$ ; and output gate  $o_t$ . The memory cell  $c_t$  is controlled by the other two gates  $i_t$  and  $f_t$ : each hour's weather input is written to memory cell  $c_t$  based on the activation of signal  $i_t$ , and the previous cell memory  $c_{t-1}$  will be "forgotten" or "cleared" based on activation of signal  $f_t$ . Whereas the upper channel of the illustrated LSTM unit propagates cell memory without much interference, the lower channel provides a short-term memory output through  $o_t$  based on the current cell state and a version of long-term memory that is filtered using a hyperbolic tangent transformation. The LSTM unit calculates hidden state  $h_t$  as follows:

$$\begin{aligned}
 i_t &= \sigma(x_t U^i + h_{t-1} W^i) \\
 f_t &= \sigma(x_t U^f + h_{t-1} W^f) \\
 o_t &= \sigma(x_t U^o + h_{t-1} W^o) \\
 \tilde{c}_t &= \tanh(x_t U^g + h_{t-1} W^g) \\
 c_t &= \sigma(f_t * c_{t-1} + i_t * \tilde{c}_t) \\
 h_t &= \tanh(c_t) * o_t,
 \end{aligned}$$

where  $i_t$ ,  $f_t$ , and  $o_t$  are the input gate activation vector, forget gate activation vector, and output gate activation vector, respectively.  $U^i, W^i, U^f, W^f, U^o, W^o, U^g, W^g$  are weight matrices to be learned during training,  $\sigma(x) = \frac{1}{1+e^{-x}}$ ,  $\tanh(x) = \frac{e^{2x}-1}{e^{2x}+1}$ , and  $*$  is element-wise multiplication.

## 2 Supplementary Tables and Figures

| Layer Type      | Input Shape    | Activation Fnc. | Output Shape |
|-----------------|----------------|-----------------|--------------|
| LSTM            | $(n, 10, 100)$ | tanh            | $(n, 128)$   |
| Fully connected | $(n, 128)$     | ReLU            | $(n, 128)$   |
| Fully connected | $(n, 128)$     | ReLU            | $(n, 64)$    |
| Fully connected | $(n, 64)$      | ReLU            | $(n, 16)$    |
| Output          | $(n, 16)$      | ReLU            | $(n, 1)$     |

Table 1: Architecture of the LSTM model, where  $n$  is the batch size. 100 input features consisting of PCA-reduced weather data and the cyclically encoded hour are input to an LSTM layer of 128 nodes. Fully connected layers then translate the LSTM layer’s output into a forecast for the next hour’s outages.

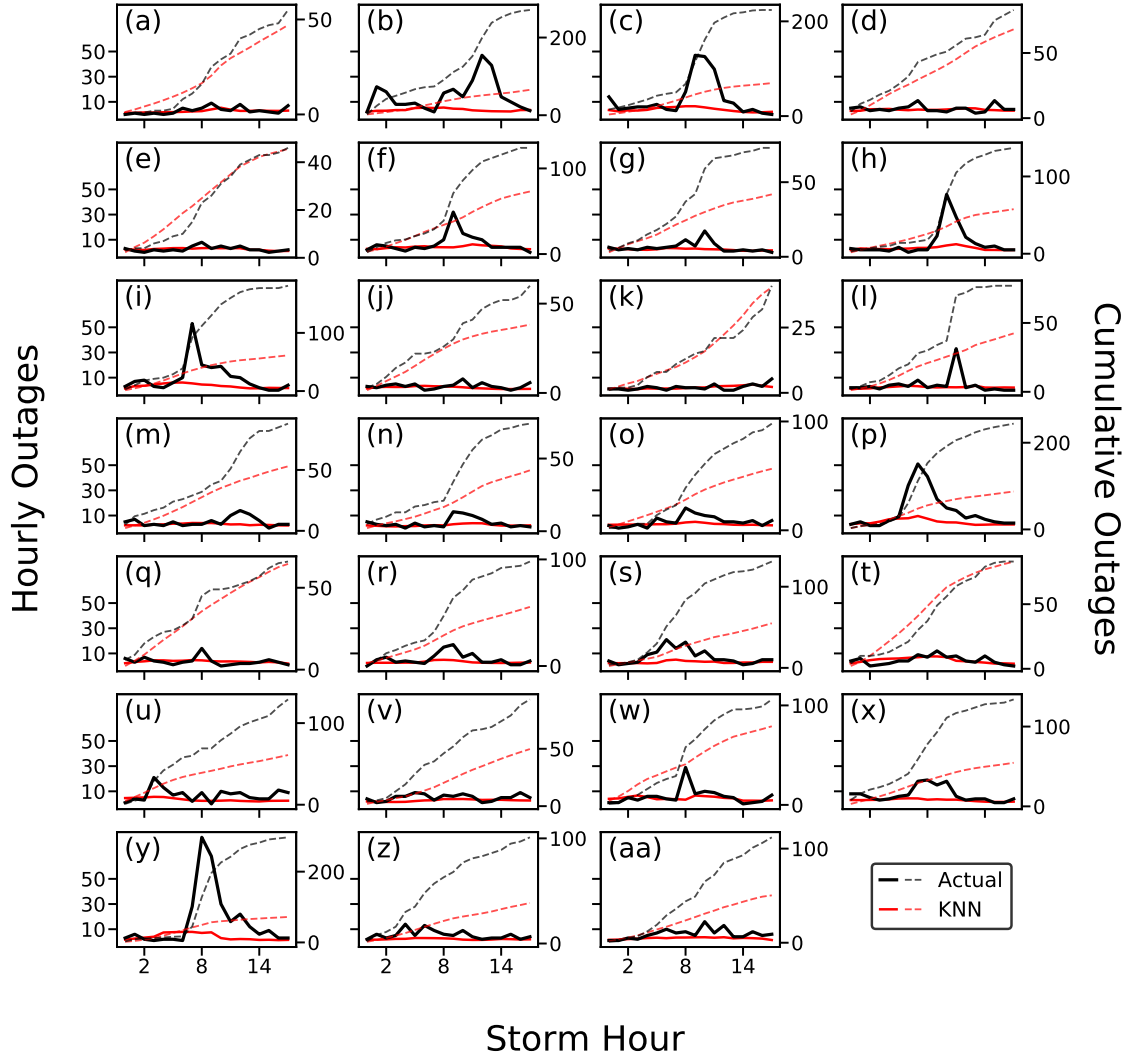

Figure 2: Hourly (solid) and cumulative (dashed) outages for 27 CT thunderstorms, each lasting 18 hours, with corresponding LOSO cross-validated predictions by KNN.

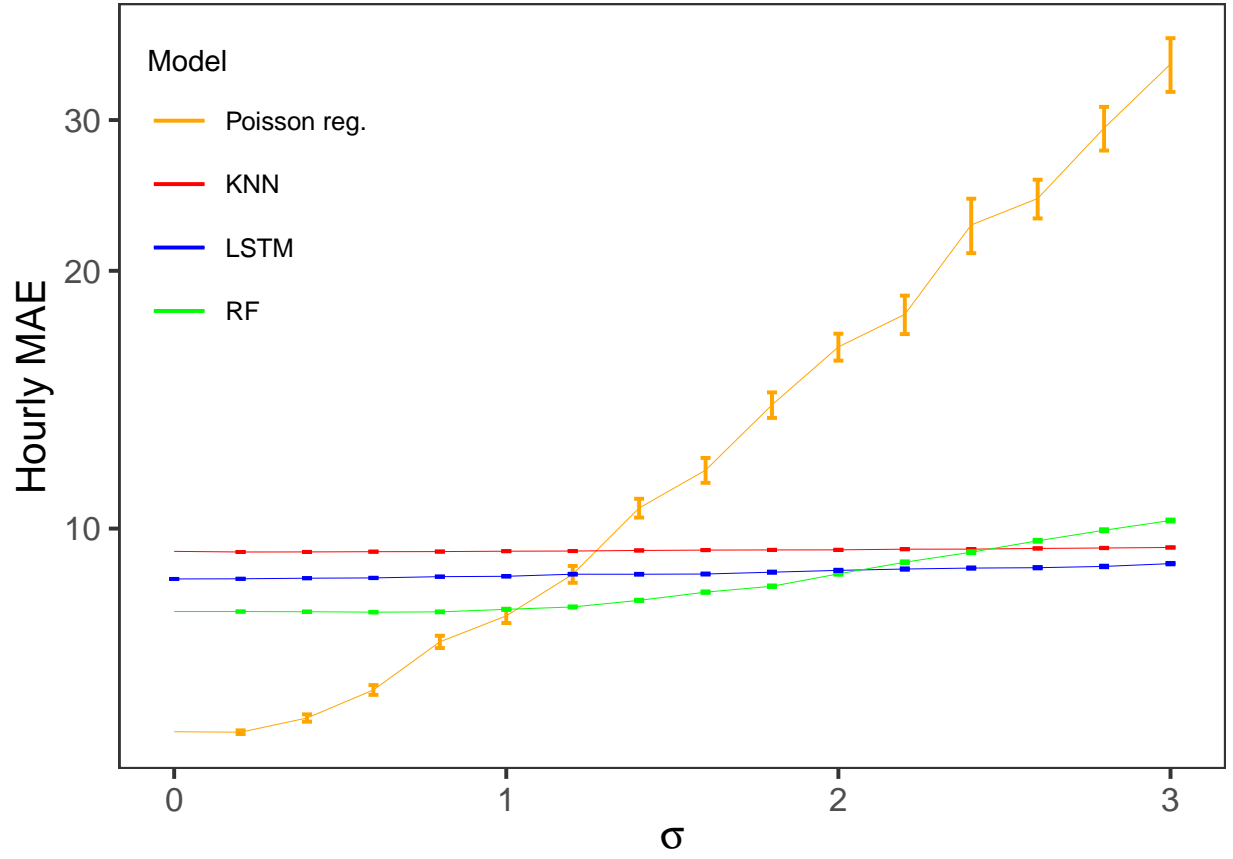

Figure 3: Simulation results for the hourly MAE in log-scale of each dynamic OPM as a function of the level of noise, distributed  $\mathcal{N}(0, \sigma)$ , in the PCA-scored forecast of a held out thunderstorm (“p”) on July 17, 2018. Error bars represent the standard error of each estimate over 300 random samples of noise at each  $\sigma$ .

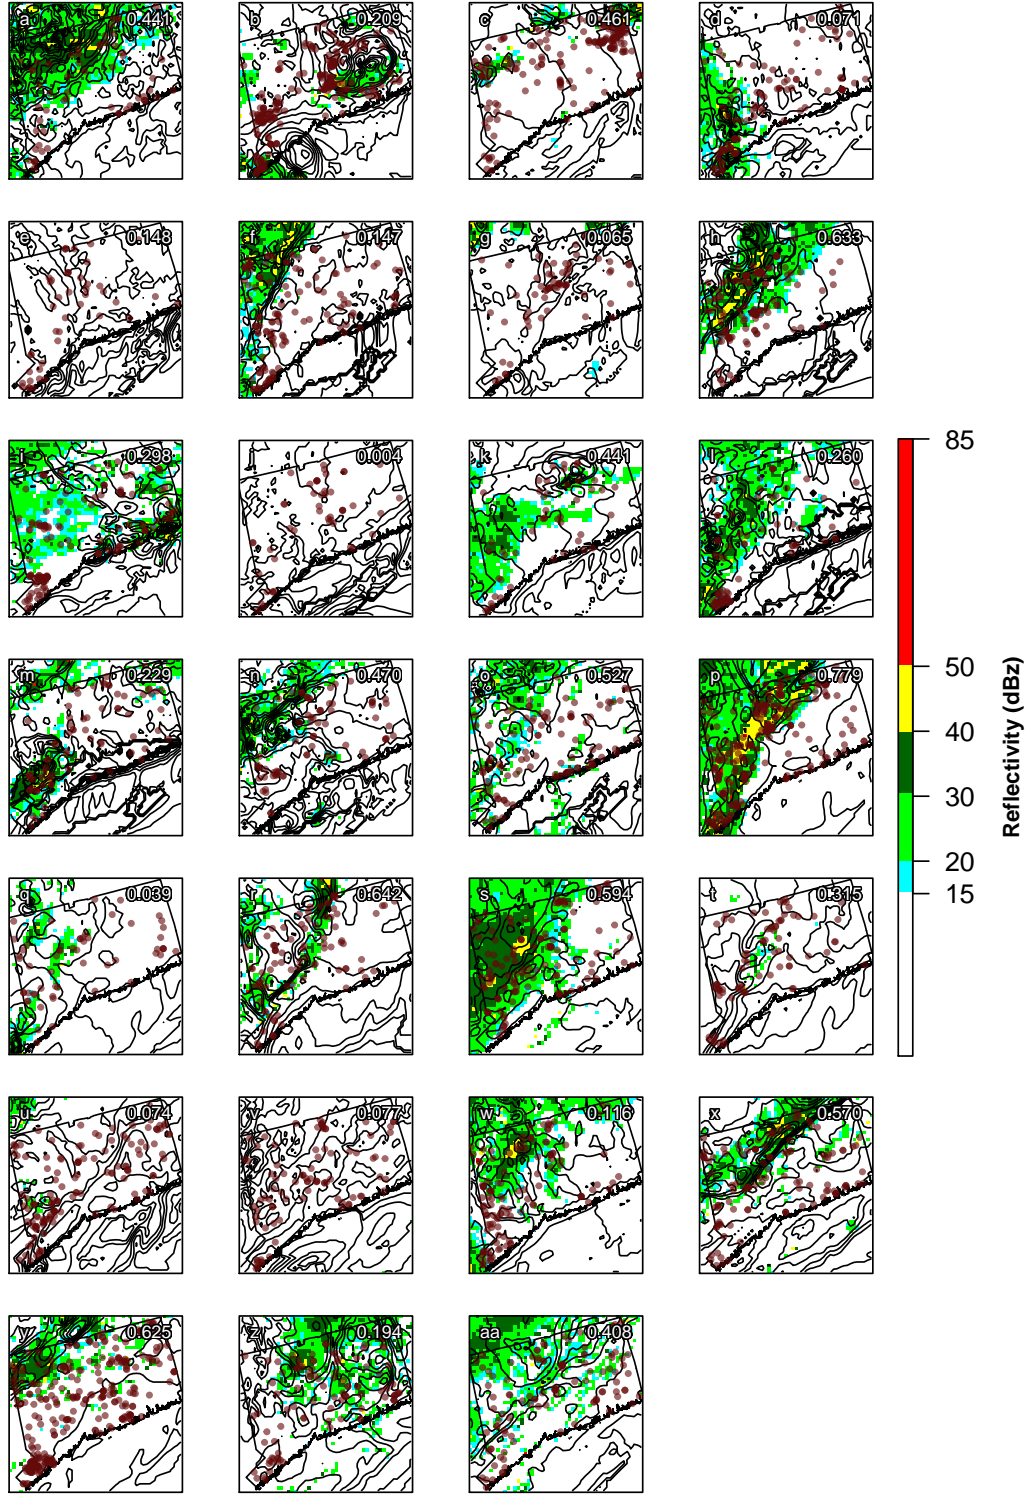

Figure 4: For each storm, the HRRR-simulated zero-hour reflectivity and contours of wind speed at the hour of peak outages, overlaid with outage occurrences accumulated over the 18-hour period. The hourly  $r^2$  — averaged across the dynamic OPMs — is shown in the top right of each panel.

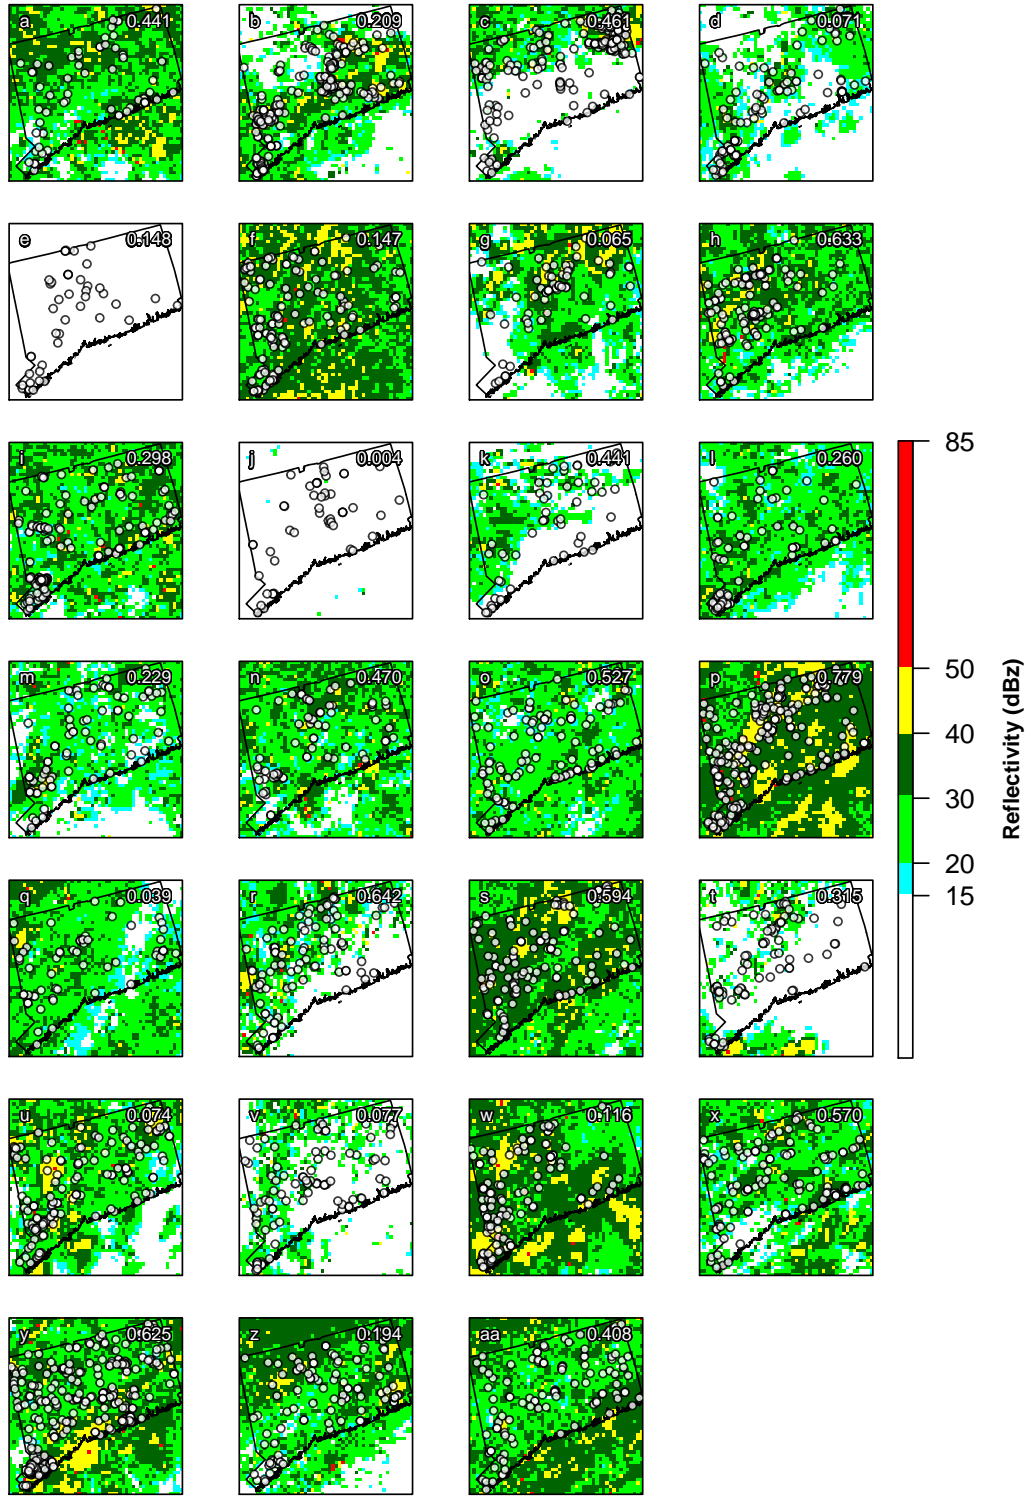

Figure 5: For each storm, the maximum HRRR-simulated zero-hour reflectivity overlaid with outage occurrences accumulated over the 18-hour period. The hourly  $r^2$  — averaged across the dynamic OPMs — is shown in the top right of each panel.

## References

- [1] Goodfellow, I.; Bengio, Y.; Courville, A.; Bengio, Y. *Deep Learning*; MIT Press: Cambridge, MA, USA, 2016; Volume 1.
- [2] Zaytar, M.A.; El Amrani, C. Sequence to sequence weather forecasting with long short term memory recurrent neural networks. *Int. J. Comput. Appl.* **2016**, *143*, 7–11.
- [3] Hochreiter, S.; Schmidhuber, J. LSTM can solve hard long time lag problems. In *Advances in Neural Information Processing Systems*; MIT Press: Cambridge, MA, USA, 1997; pp. 473–479.
