# Supplementary material
Source: MDPI journal article supplement (https://www.mdpi.com/2571-9394/2/2/8)
Supplement: s1 [file s1]

Archive with 11 entries (11 files):
- SupplementaryDataFile1.csv
- timeseries_tstorms_wSum_KNN.pdf
- LSTM.png
- maxReftWithOutages.pdf
- peakOutageReftAndWinds.pdf
- performance_vs_noise.pdf
- supplement.aux
- supplement.log
- Supplement.pdf
- supplement.synctex.gz
- supplement.tex
