# Supplementary material
Source: MDPI journal article supplement (https://www.mdpi.com/2571-9394/2/2/8)
Supplement: s1 [file s1 › supplement.aux]

\relax 
\citation{goodfellow2016deep}
\citation{zaytar2016sequence}
\citation{hochreiter1997lstm}
\@writefile{toc}{\contentsline {section}{\numberline {1}Description of the LSTM model}{2}}
\@writefile{lof}{\contentsline {figure}{\numberline {1}{\ignorespaces Unrolled architecture of an LSTM node in a neural network. The $t$th unit has been enlarged.}}{2}}
\newlabel{fig_LSTM}{{1}{2}}
\@writefile{toc}{\contentsline {section}{\numberline {2}Supplementary Tables and Figures}{3}}
\@writefile{lot}{\contentsline {table}{\numberline {1}{\ignorespaces Architecture of the LSTM model, where $n$ is the batch size. 100 input features consisting of PCA-reduced weather data and the cyclically encoded hour are input to an LSTM layer of {128} nodes. Fully connected layers then translate the LSTM layer's output into a forecast for the next hour's outages.}}{3}}
\newlabel{fig_model_architecture}{{1}{3}}
\@writefile{lof}{\contentsline {figure}{\numberline {2}{\ignorespaces {Hourly (solid) and cumulative (dashed) outages for 27 CT thunderstorms, each lasting 18 hours, with corresponding LOSO cross-validated predictions by KNN.}}}{4}}
\newlabel{fig_timeseries_tstorms}{{2}{4}}
\@writefile{lof}{\contentsline {figure}{\numberline {3}{\ignorespaces {Simulation results for the hourly MAE in log-scale of each dynamic OPM as a function of the level of noise, distributed $\mathcal  {N}(0, \sigma )$, in the PCA-scored forecast of a held out thunderstorm (``p'') on July 17, 2018. Error bars represent the standard error of each estimate over 300 random samples of noise at each $\sigma $.}}}{5}}
\newlabel{fig_performance_vs_noise}{{3}{5}}
\@writefile{lof}{\contentsline {figure}{\numberline {4}{\ignorespaces {For each storm, the HRRR-simulated zero-hour reflectivity and contours of wind speed at the hour of peak outages, overlaid with outage occurrences accumulated over the 18-hour period. The hourly $r^2$ --- averaged across the dynamic OPMs --- is shown in the top right of each panel.}}}{6}}
\newlabel{fig_peakOutageReft}{{4}{6}}
\@writefile{lof}{\contentsline {figure}{\numberline {5}{\ignorespaces {For each storm, the maximum HRRR-simulated zero-hour reflectivity overlaid with outage occurrences accumulated over the 18-hour period. The hourly $r^2$ --- averaged across the dynamic OPMs --- is shown in the top right of each panel.}}}{7}}
\newlabel{fig_maxReftWithOutages}{{5}{7}}
\bibcite{goodfellow2016deep}{1}
\bibcite{zaytar2016sequence}{2}
\bibcite{hochreiter1997lstm}{3}
