# Supplementary material
Source: MDPI journal article supplement (https://www.mdpi.com/2571-9394/2/2/8)
Supplement: s1 [file s1 › supplement.tex]

\documentclass[11pt]{article}
\usepackage[utf8]{inputenc}
\usepackage{authblk}
\usepackage{array}
\usepackage[top=1in, bottom=1.2in, left=1in, right=1in]{geometry}
\usepackage{graphicx}
\usepackage{amsmath}

\title{Supplementary materials for ``Dynamic Modeling of Power Outages Caused by Thunderstorms''}
\author[1]{Berk Alpay}
\author[2]{David Wanik}
\author[3]{Peter Watson}
\author[3]{Diego Cerrai}
\author[1]{Guannan Liang}
\author[3]{Emmanouil Anagnostou}

\affil[1]{University of Connecticut, Department of Computer Science and Engineering}
\affil[2]{University of Connecticut, Department of Operations and Information Management}
\affil[3]{University of Connecticut, Department of Civil and Environmental Engineering}
 


\begin{document}

\date{}
\maketitle

\newpage
\section{Description of the LSTM model}

Recurrent neural networks (RNN) are designed to optimize dynamically interconnected, non-linear parameters \cite{goodfellow2016deep}. We use this property to capture temporal relationships in chaotic atmospheric contexts. The viability of such a model in atmospheric science was demonstrated in the area of sequential weather forecasting \cite{zaytar2016sequence}. The RNN is used with long short-term memory (LSTM) structure to adjust for lags between severe weather and outage occurrences, as LSTMs were shown to be capable of learning long-term dependencies between features and response \cite{hochreiter1997lstm}. A mathematical description of the operation of an LSTM unit within a neural network now follows.

\begin{figure}[h!]
\centering
\includegraphics[width=0.9\textwidth]{LSTM.png}
\caption{Unrolled architecture of an LSTM node in a neural network. The $t$th unit has been enlarged.}
\label{fig_LSTM}
\end{figure}
\raggedbottom

Let $x = [ x_1,..., x_t, ..., x_{T}]$ be a timeseries data sample, where $x_t$ for $t \in [1,..., T]$ represents the $t$-th observation in the series. In our application, $x_1,..., x_T$ corresponds to each hour $[ h-l,...,h]$, where $h$ is the current hour and $l$ the lookback period.

From Figure \ref{fig_LSTM}, we see that each LSTM unit is composed of the following components: memory cell $c_t$; input gate $i_t$; forget gate $f_t$; and output gate $o_t$. The memory cell $c_t$ is controlled by the other two gates $i_t$ and $f_t$: each hour's weather input is written to memory cell $c_t$ based on the activation of signal $i_t$, and the previous cell memory $c_{t-1}$ will be ``forgotten'' or ``cleared'' based on activation of signal $f_t$. Whereas the upper channel of the illustrated LSTM unit propagates cell memory without much interference, the lower channel provides a short-term memory output through $o_t$ based on the current cell state and a version of long-term memory that is filtered using a hyperbolic tangent transformation. The LSTM unit calculates hidden state $h_t$ as follows:
\begin{align*}
    i_t &= \sigma( x_t U^i + h_{t-1} W^i)\\
    f_t &= \sigma( x_t U^f + h_{t-1} W^f)\\
    o_t &= \sigma( x_t U^o + h_{t-1} W^o)\\
    \tilde{c_t} &= \tanh( x_t U^g + h_{t-1} W^g)\\
    c_t &= \sigma( f_t *c_{t-1} + i_t*\tilde{c_t})\\
    h_t &= \tanh( c_t )* o_t,
\end{align*}
where $i_t$, $f_t$, and $o_t$ are the input gate activation vector, forget gate activation vector, and output gate activation vector, respectively. $U^i, W^i, U^f, W^f, U^o, W^o, U^g, W^g$ are weight matrices to be learned during training, $\sigma(x) = \frac{1}{1+ e^{-x}}$, $\tanh( x ) = \frac{e^{2x} -1 }{e^{2x}+1}$, and $*$ is element-wise multiplication.

%%% FIGURES
\newpage
\section{Supplementary Tables and Figures}

\begin{table}[h!]
    \centering
    \begin{tabular}{c|c|c | c }
        \textbf{Layer Type} & \textbf{Input Shape} & \textbf{Activation Fnc.} & \textbf{Output Shape} \\
        \hline
         LSTM &($n$, 10, 100) & tanh &  ($n$, 128)\\
         Fully connected &($n$, 128) & ReLU &($n$, 128)\\
         Fully connected &($n$, 128) & ReLU & ($n$, 64)\\
         Fully connected &($n$, 64) & ReLU &($n$, 16) \\
         Output &($n$, 16) & ReLU& ($n$, 1) \\
    \end{tabular}
    \caption{Architecture of the LSTM model, where $n$ is the batch size. 100 input features consisting of PCA-reduced weather data and the cyclically encoded hour are input to an LSTM layer of {128} nodes. Fully connected layers then translate the LSTM layer's output into a forecast for the next hour's outages.}
    \label{fig_model_architecture}
\end{table}


\newpage
\begin{figure*}[h!]
    \centering
    \includegraphics[width=\textwidth]{timeseries_tstorms_wSum_KNN.pdf}
    \caption{{Hourly (solid) and cumulative (dashed) outages for 27 CT thunderstorms, each lasting 18 hours, with corresponding LOSO cross-validated predictions by KNN.}}
    \label{fig_timeseries_tstorms}
\end{figure*}

\newpage
\begin{figure*}[h!]
\centering
\includegraphics[width=\textwidth]{performance_vs_noise.pdf}
\caption{{Simulation results for the hourly MAE in log-scale of each dynamic OPM as a function of the level of noise, distributed $\mathcal{N}(0, \sigma)$, in the PCA-scored forecast of a held out thunderstorm (``p'') on July 17, 2018. Error bars represent the standard error of each estimate over 300 random samples of noise at each $\sigma$.}}
\label{fig_performance_vs_noise}
\end{figure*}

\newpage
\begin{figure*}[h!]
\centering
\includegraphics[width=0.84\textwidth]{peakOutageReftAndWinds.pdf}
\caption{{For each storm, the HRRR-simulated zero-hour reflectivity and contours of wind speed at the hour of peak outages, overlaid with outage occurrences accumulated over the 18-hour period. The hourly $r^2$ --- averaged across the dynamic OPMs --- is shown in the top right of each panel.}}
\label{fig_peakOutageReft}
\end{figure*}

\newpage
\begin{figure*}[h!]
\centering
\includegraphics[width=0.84\textwidth]{maxReftWithOutages.pdf}
\caption{{For each storm, the maximum HRRR-simulated zero-hour reflectivity overlaid with outage occurrences accumulated over the 18-hour period. The hourly $r^2$ --- averaged across the dynamic OPMs --- is shown in the top right of each panel.}}
\label{fig_maxReftWithOutages}
\end{figure*}

\newpage
\clearpage

\begin{thebibliography}{5}
\bibitem{goodfellow2016deep}
Goodfellow, I.; Bengio, Y.; Courville, A.; Bengio, Y.
\newblock {\em Deep Learning}; MIT Press: Cambridge, MA, USA, 2016; Volume 1.

\bibitem{zaytar2016sequence}
Zaytar, M.A.; El~Amrani, C.
\newblock Sequence to sequence weather forecasting with long short term memory
  recurrent neural networks.
\newblock {\em Int. J. Comput. Appl.} {\bf 2016}, {\em 143},~7--11.

\bibitem{hochreiter1997lstm}
Hochreiter, S.; Schmidhuber, J.
\newblock {LSTM} can solve hard long time lag problems.
\newblock In {\em Advances in Neural Information Processing Systems};  {MIT Press: Cambridge, MA, USA}, 1997; pp. 473--479.

\end{thebibliography}

\end{document}
