# Supplementary material
Source: MDPI journal article supplement (https://www.mdpi.com/2571-9394/2/2/8)
Supplement: s1 [file s1 › SupplementaryDataFile1.csv]

architecture	hourly_R2
(16,)	0.40161286498029947
(16, 16)	0.48331198350111765
(16, 16, 16)	0.4421944292832964
(16, 16, 16, 16)	0.3347277475312443
(64,)	0.4721246387952942
(64, 16)	0.5528370973355904
(64, 16, 16)	0.5640031989749673
(64, 16, 16, 16)	0.5870581526334692
(64, 64)	0.49862483585199024
(64, 64, 16)	0.5182049950571653
(64, 64, 16, 16)	0.6088220738776903
(64, 64, 64)	0.48923282060224654
(64, 64, 64, 16)	0.4406187782914939
(64, 64, 64, 64)	0.5446969363075792
(128,)	0.662324011133547
(128, 16)	0.47311061835252594
(128, 16, 16)	0.6018415246990435
(128, 16, 16, 16)	0.5719395618878168
(128, 64)	0.6216078404908821
(128, 64, 16)	0.5769829511678884
(128, 64, 16, 16)	0.5362478859714535
(128, 64, 64)	0.5413594993675417
(128, 64, 64, 16)	0.4875140269504999
(128, 64, 64, 64)	0.6116453468350295
(128, 128)	0.5168053570431409
(128, 128, 16)	0.6377823291202275
(128, 128, 16, 16)	0.48546924498966937
(128, 128, 64)	0.45281929301111284
(128, 128, 64, 16)	0.7370422612188708
(128, 128, 64, 64)	0.5894338096610773
(128, 128, 128)	0.6006000680466383
(128, 128, 128, 16)	0.6047646403182974
(128, 128, 128, 64)	0.5678771290021939
(128, 128, 128, 128)	0.5454601699190402
(256,)	0.636594793906232
(256, 16)	0.699103827928789
(256, 16, 16)	0.4799815186878262
(256, 16, 16, 16)	0.4826600148105127
(256, 64)	0.47027430887821375
(256, 64, 16)	0.5400263870541754
(256, 64, 16, 16)	0.6335009652447979
(256, 64, 64)	0.594885332229287
(256, 64, 64, 16)	0.5789039820260823
(256, 64, 64, 64)	0.4863768325897598
(256, 128)	0.6253347755896816
(256, 128, 16)	0.4976554058518037
(256, 128, 16, 16)	0.6246654323334627
