# Supplementary material
Source: MDPI journal article supplement (https://www.mdpi.com/2571-9394/2/2/8)

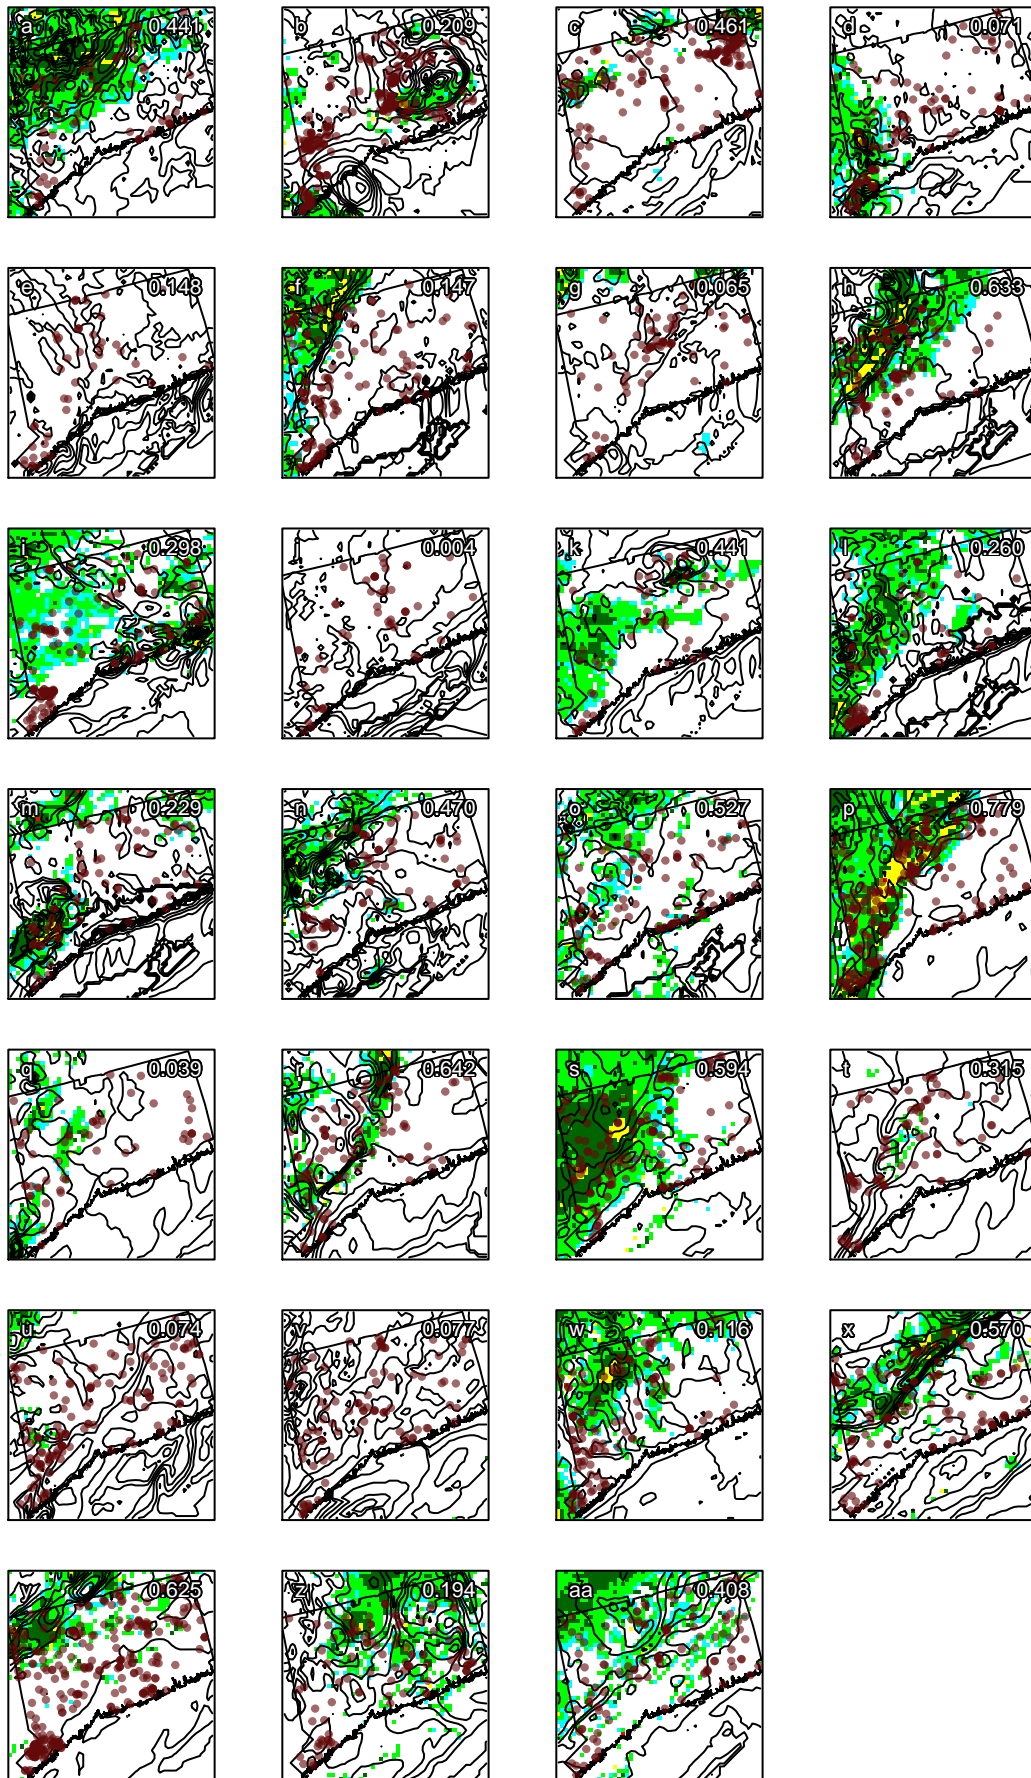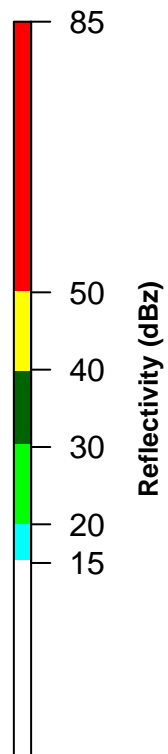

Supplement: s1 [file s1]

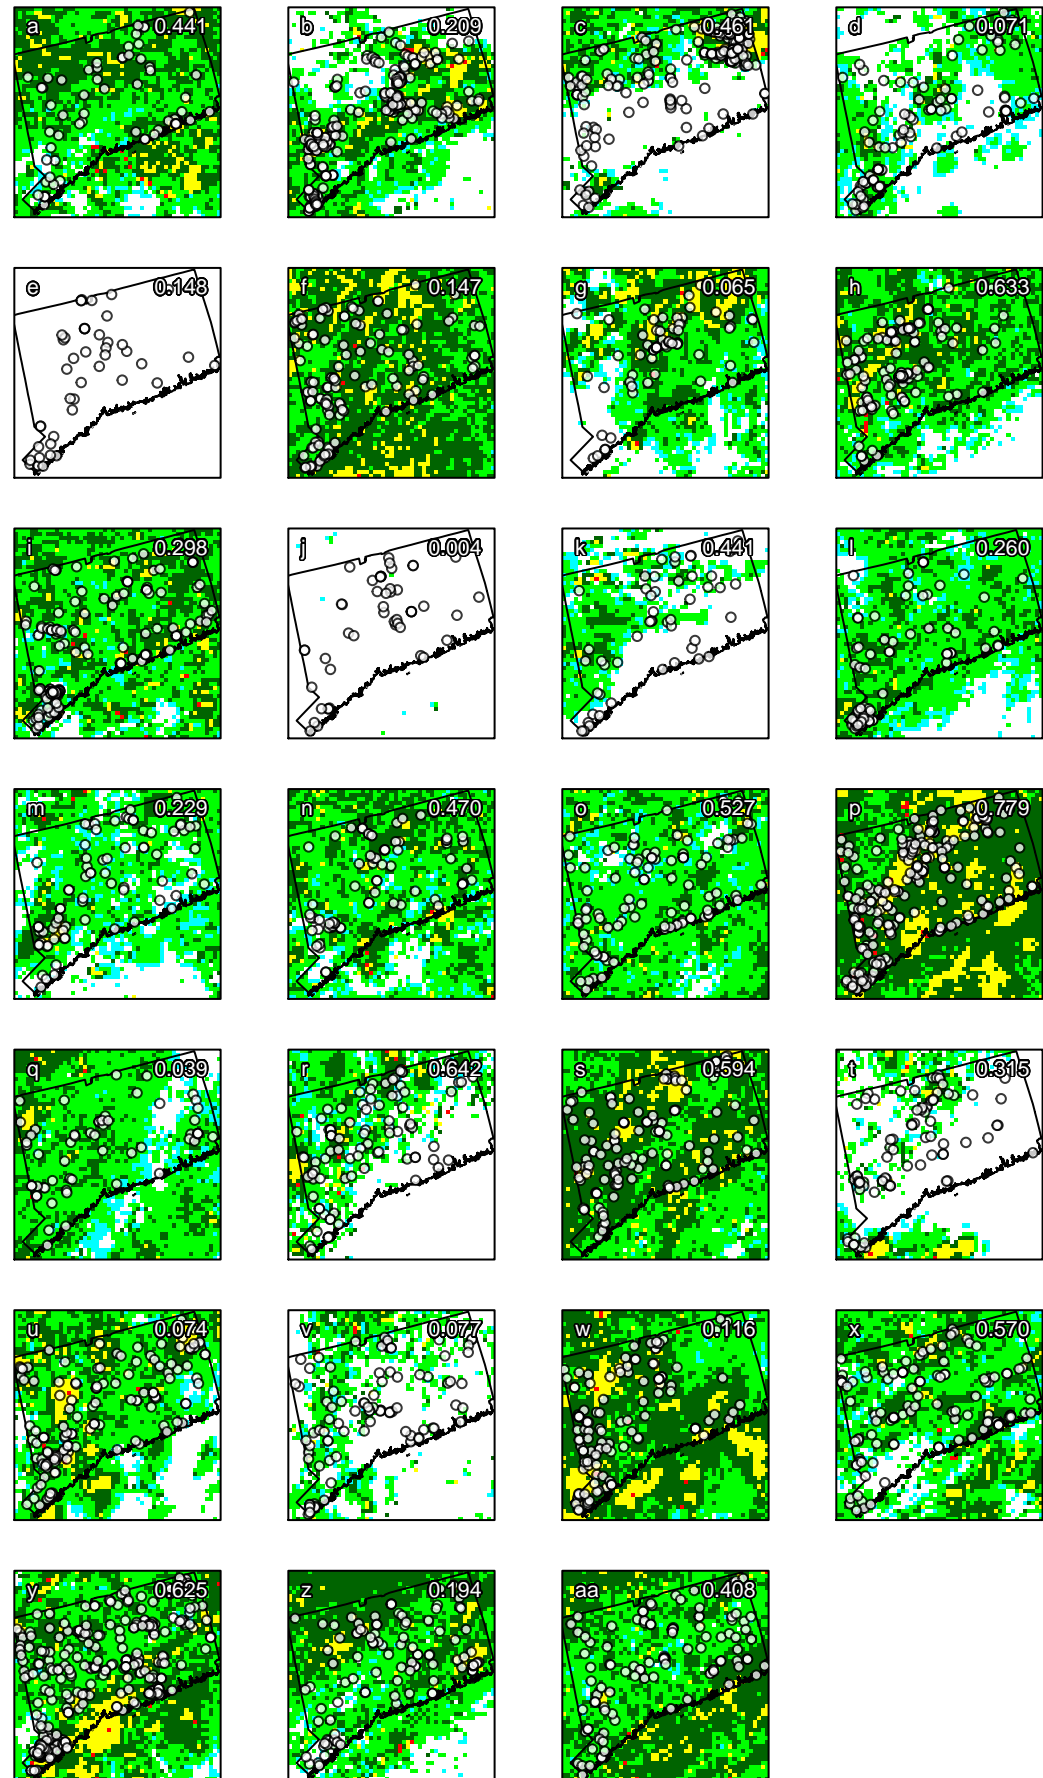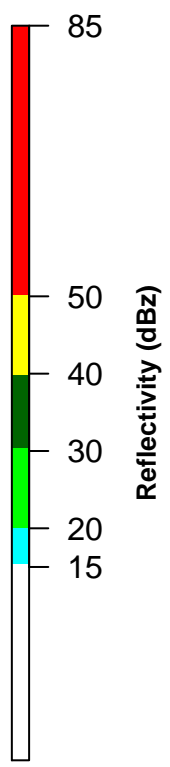

Supplement: s1 [file s1]

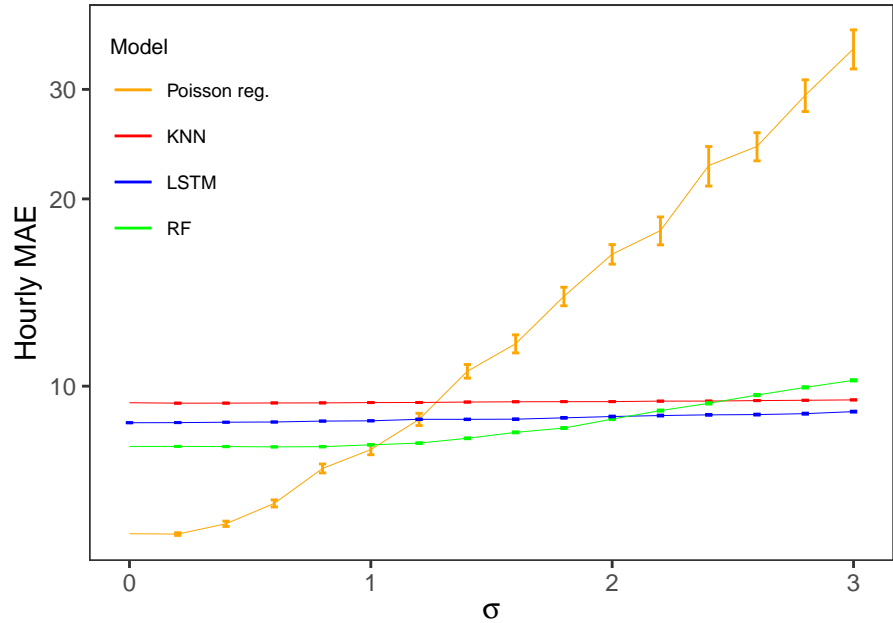

Supplement: s1 [file s1]

Hourly Outages

Cumulative Outages

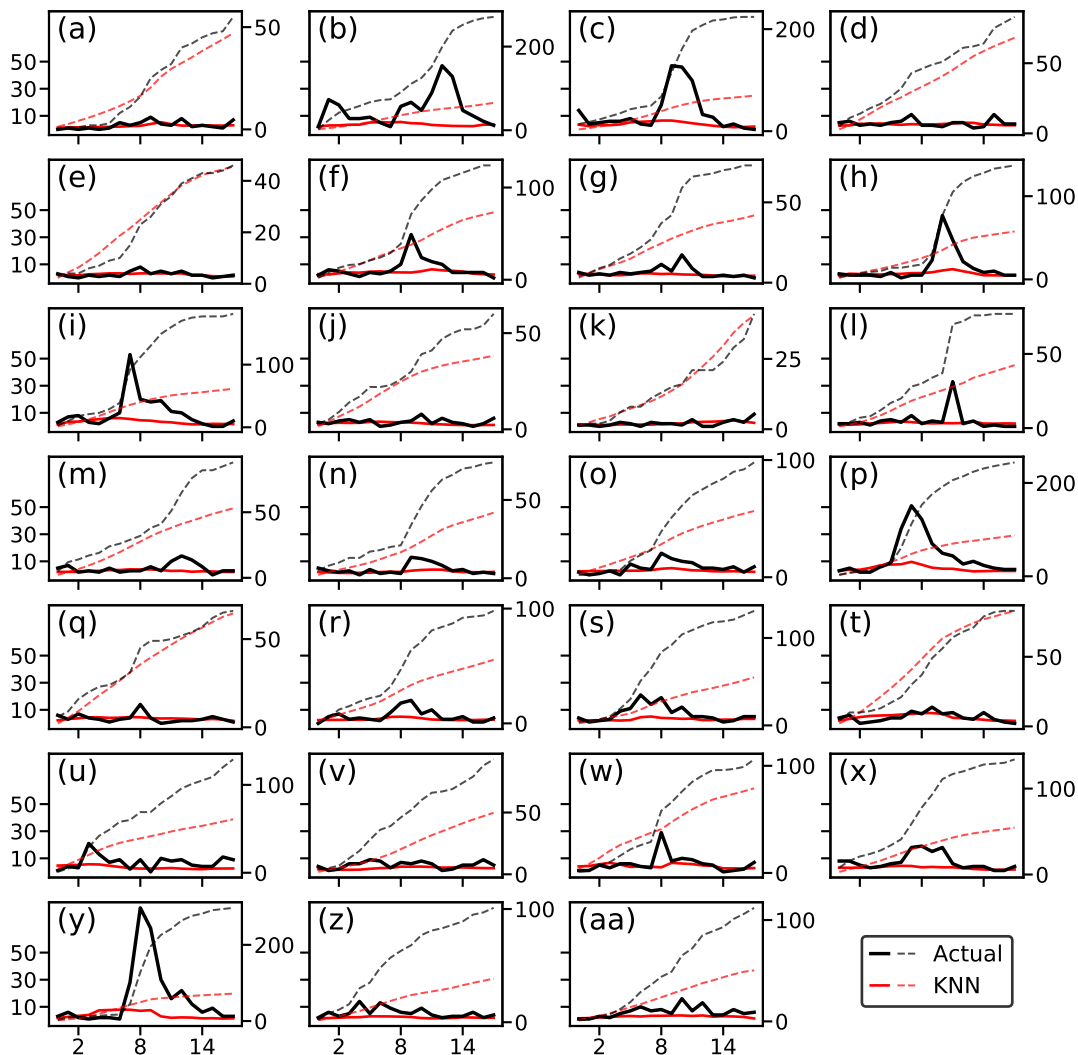

Storm Hour

Supplement: s1 [file s1]

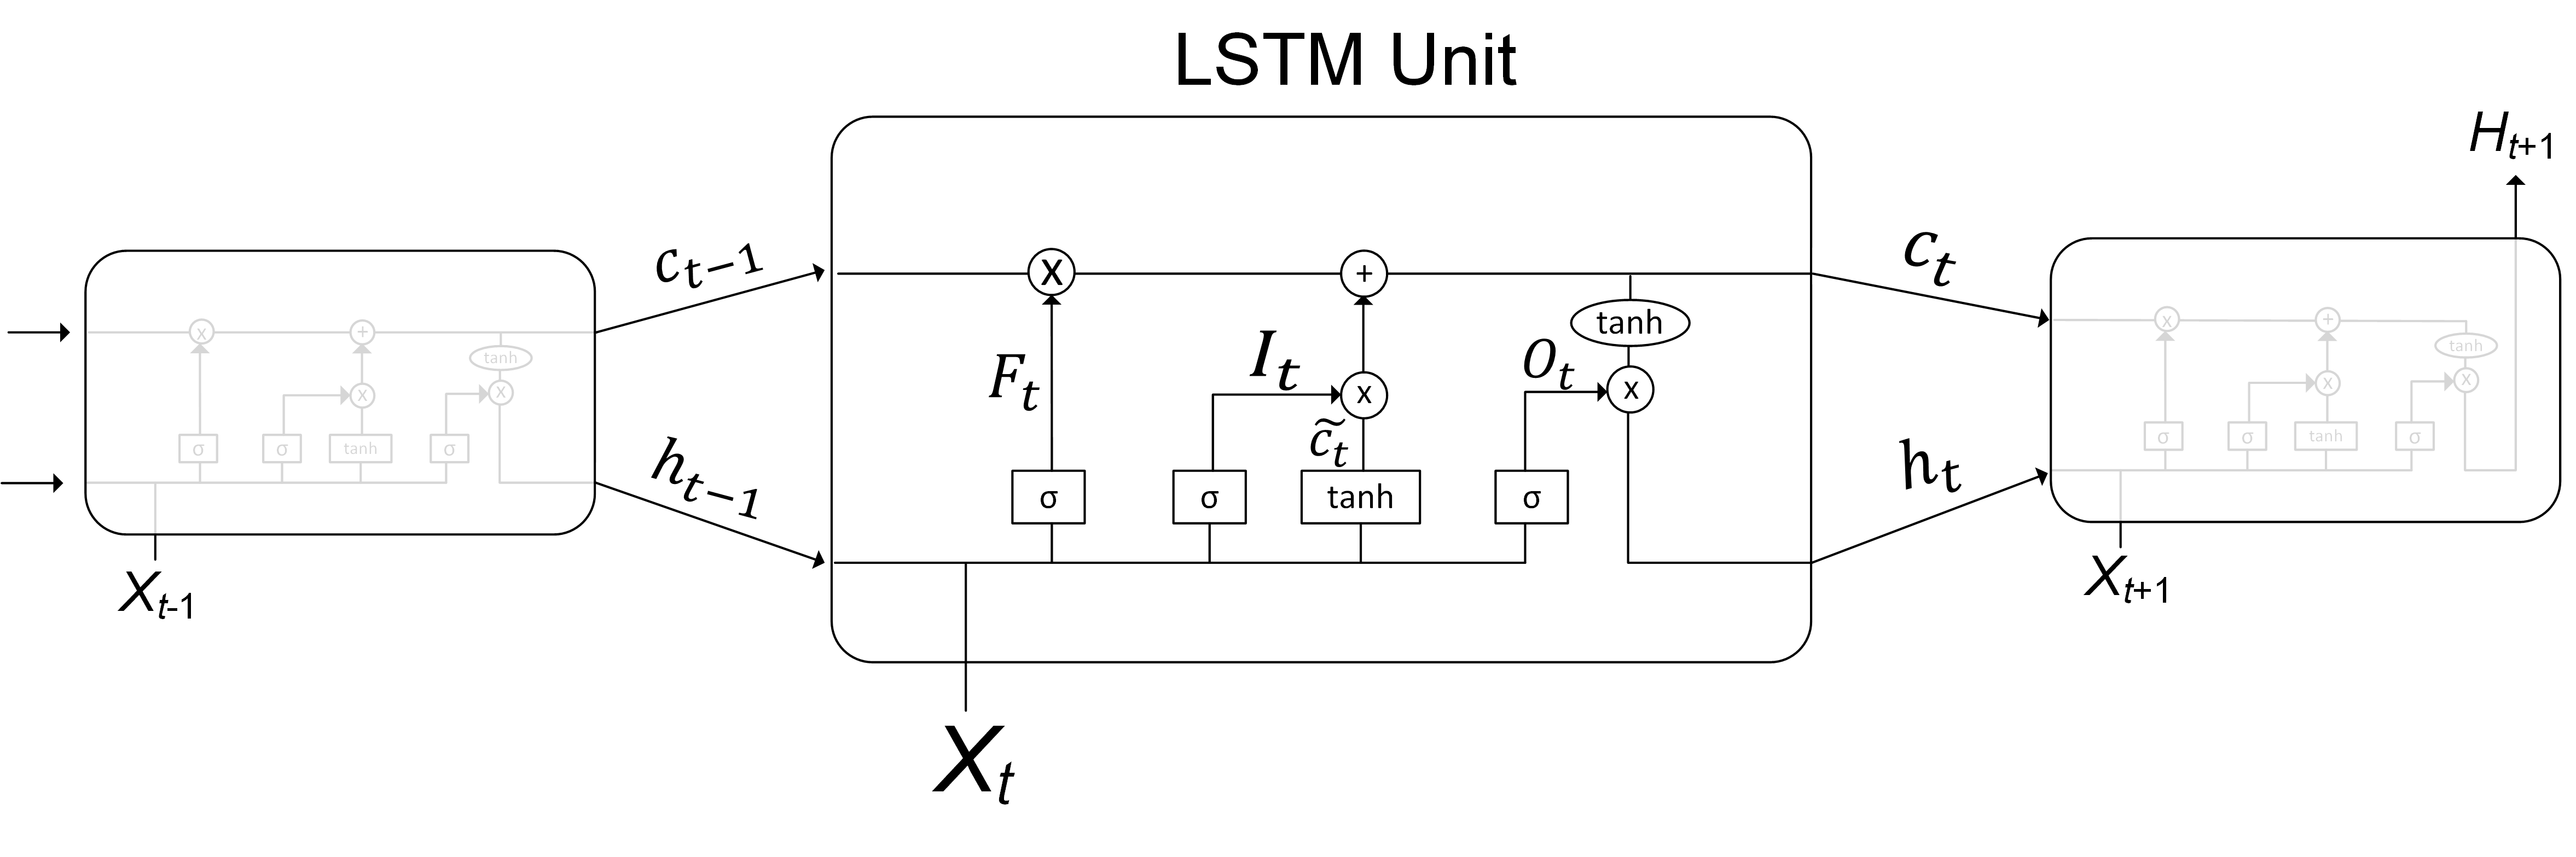

Supplement: s1 [file s1 › LSTM.png]
